# Supplementary material for: A Dietary Intervention of Bioactive Enriched Foods Aimed at Adults at Risk of Metabolic Syndrome: Protocol and Results from PATHWAY-27 Pilot Study
Source: PubMed Central journal article supplement (PMC6723599; doi:10.3390/nu11081814), 2019-08-06
Supplement: nutrients-11-01814-s001.pdf [file nutrients-11-01814-s001.pdf]

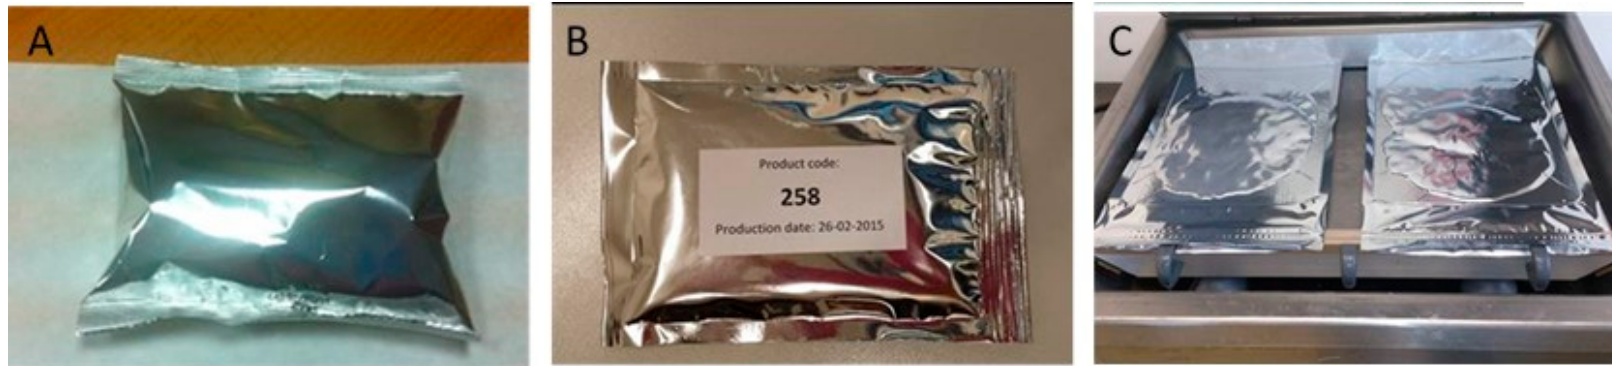

**Figure S1.** Packaging used in PATHWAY-27. (A) biscuits, (B) milkshake powder, (C) pancakes.

**Table S1.** Quantitative analysis of SCFA and MCFA in fasting serum at T0 and T28 of the dairy intervention.

|    | Concentration in fasting serum ( $\mu\text{M}$ ) |          |                |      |                 |      |              |       |                                   |       |              |       |               |       |                |       |
|----|--------------------------------------------------|----------|----------------|------|-----------------|------|--------------|-------|-----------------------------------|-------|--------------|-------|---------------|-------|----------------|-------|
|    | acetic acid                                      |          | propionic acid |      | isobutyric acid |      | butyric acid |       | 2-methylbutyric + isovaleric acid |       | valeric acid |       | Hexanoic acid |       | Heptanoic acid |       |
|    | T0                                               | T28      | T0             | T28  | T0              | T28  | T0           | T28   | T0                                | T28   | T0           | T28   | T0            | T28   | T0             | T28   |
| AC | 22.86                                            | 47.81    | 4.09           | 4.29 | 2.65            | 2.24 | 2.315        | 2.675 | 1.674                             | 4.099 | 0.148        | 0.175 | 0.661         | 0.73  | 0.132          | 0.168 |
| AC | 79.82                                            | 39.27    | 4.17           | 3.66 | 1.81            | 1.94 | 3.056        | 2.261 | 2.713                             | 2.42  | 0.291        | 0.16  | 1.046         | 0.736 | 0.202          | 0.117 |
| AC | 26.16                                            | 35.95    | 2.79           | 3.69 | 2.2             | 1.98 | 1.68         | 2.625 | 1.135                             | 2.048 | 0.164        | 0.227 | 0.708         | 0.785 | 0.129          | 0.158 |
| AC | 21.35                                            | 24.1     | 3.74           | 3.51 | 2.03            | 2.53 | 2.153        | 2.066 | 0.888                             | 1.026 | 0.646        | 0.68  | 0.794         | 0.644 | 0.152          | 0.138 |
| AC | 23.43                                            | 29.61    | 3.09           | 3.28 | 2.01            | 2.14 | 1.921        | 1.703 | 1.737                             | 3.383 | 0.144        | 0.161 | 0.734         | 0.702 | 0.181          | 0.134 |
| AC | 44.73                                            | 40.52    | 7.81           | 5.73 | 3.63            | 3.1  | 8.274        | 4.248 | 2.476                             | 2.769 | 0.752        | 0.668 | 0.473         | 0.516 | 0.101          | 0.112 |
| AC | 26.92                                            | 1041.32* | 2.74           | 3.3  | 1.9             | 2.21 | 1.817        | 2.568 | 1.237                             | 1.934 | 0.117        | 0.134 | 0.701         | 1.061 | 0.156          | 0.423 |
| AC | 25.76                                            | 231.65   | 2.94           | 3.13 | 1.73            | 1.84 | 1.646        | 1.786 | 1.389                             | 2.002 | 0.124        | 0.172 | 0.52          | 0.698 | 0.088          | 0.11  |
| AC | 18.32                                            | 20.16    | 2.33           | 2.2  | 1.89            | 1.71 | 1.158        | 1.051 | 1.215                             | 1.666 | 0.112        | 0.134 | 0.557         | 0.587 | 0.097          | 0.116 |
| AC | 17.51                                            | 23.02    | 2.21           | 2.37 | 1.98            | 1.74 | 1.281        | 1.467 | 1.024                             | 2.146 | 0.098        | 0.138 | 0.41          | 0.502 | 0.095          | 0.105 |
| AC | 23.87                                            | 25.57    | 3.57           | 4.4  | 1.96            | 2.36 | 2.108        | 1.769 | 1.645                             | 1.957 | 0.144        | 0.126 | 0.596         | 0.569 | 0.121          | 0.101 |
| AC | 18.53                                            | 17.66    | 2.62           | 2.16 | 1.9             | 1.43 | 1.392        | 1.255 | 1.154                             | 1.086 | 0.117        | 0.13  | 0.782         | 0.713 | 0.125          | 0.119 |
| AC | 21.17                                            | 26.62    | 2.44           | 2.17 | 1.66            | 1.62 | 1.262        | 1.214 | 2.13                              | 1.619 | 0.094        | 0.096 | 0.558         | 0.679 | 0.114          | 0.14  |
| AC | 28.61                                            | 26.33    | 2.3            | 2.47 | 1.96            | 1.93 | 1.24         | 1.739 | 1.424                             | 1.206 | 0.113        | 0.164 | 0.636         | 0.937 | 0.115          | 0.149 |

|             |               |               |              |              |              |              |              |              |              |              |              |              |              |              |              |              |
|-------------|---------------|---------------|--------------|--------------|--------------|--------------|--------------|--------------|--------------|--------------|--------------|--------------|--------------|--------------|--------------|--------------|
| AC          | 27.54         | 41.65         | 2.97         | 4.08         | 2.04         | 1.9          | 1.934        | 3.463        | 2.183        | 2.845        | 0.182        | 0.309        | 0.672        | 0.847        | 0.12         | 0.13         |
| <b>mean</b> | <b>28.439</b> | <b>44.994</b> | <b>3.321</b> | <b>3.363</b> | <b>2.090</b> | <b>2.045</b> | <b>2.216</b> | <b>2.126</b> | <b>1.602</b> | <b>2.147</b> | <b>0.216</b> | <b>0.232</b> | <b>0.657</b> | <b>0.714</b> | <b>0.129</b> | <b>0.148</b> |
| OBG         | 26.49         | 24.93         | 3.73         | 3.32         | 2.12         | 2.18         | 2.406        | 2.429        | 3.727        | 1.045        | 0.242        | 0.172        | 0.663        | 0.648        | 0.114        | 0.125        |
| OBG         | 18.72         | 23.46         | 3.04         | 2.63         | 1.86         | 1.76         | 1.91         | 1.92         | 1.202        | 1.773        | 0.119        | 0.219        | 0.487        | 0.712        | 0.117        | 0.125        |
| OBG         | 17.44         | 37.33         | 2.49         | 2.82         | 1.71         | 2.02         | 1.128        | 1.591        | 0.961        | 1.818        | 0.103        | 0.113        | 0.598        | 0.679        | 0.118        | 0.094        |
| OBG         | 23.98         | 28.95         | 2.81         | 3.02         | 1.91         | 1.95         | 1.345        | 1.561        | 2.026        | 2.182        | 0.097        | 0.155        | 0.77         | 0.83         | 0.105        | 0.116        |
| OBG         | 37.29         | 24.48         | 2.67         | 2.72         | 1.82         | 2.25         | 2.053        | 1.64         | 1.344        | 1.374        | 0.114        | 0.107        | 0.54         | 0.571        | 0.101        | 0.101        |
| OBG         | 24.78         | 40.03         | 2.21         | 3.2          | 1.83         | 2.11         | 2.02         | 3.005        | 1.852        | 1.695        | 0.141        | 0.351        | 0.552        | 0.547        | 0.091        | 0.132        |
| OBG         | 21            | 20.42         | 2.27         | 1.85         | 1.44         | 1.45         | 1.303        | 1.007        | 0.806        | 0.908        | 0.081        | 0.09         | 0.539        | 0.49         | 0.101        | 0.091        |
| OBG         | 17.02         | 18.89         | 2.03         | 2.78         | 1.41         | 1.53         | 0.919        | 1.168        | 0.838        | 0.995        | 0.087        | 0.104        | 0.448        | 0.438        | 0.099        | 0.119        |
| OBG         | 39.43         | 61.21         | 3.14         | 4.2          | 2.06         | 1.94         | 2.117        | 3.248        | 1.523        | 1.783        | 0.174        | 0.227        | 0.871        | 0.585        | 0.134        | 0.108        |
| OBG         | 25.49         | 28.85         | 2.8          | 3.05         | 2.05         | 1.86         | 1.61         | 1.742        | 1.458        | 1.963        | 0.173        | 0.17         | 0.805        | 0.667        | 0.161        | 0.137        |
| OBG         | 18.65         | 20.21         | 2.45         | 2.6          | 1.9          | 2.03         | 1.355        | 1.451        | 1.054        | 1.146        | 0.115        | 0.106        | 0.927        | 0.779        | 0.132        | 0.125        |
| OBG         | 24.79         | 18.45         | 3.14         | 2.6          | 1.85         | 1.52         | 1.983        | 1.41         | 1.407        | 1.47         | 0.157        | 0.159        | 0.578        | 0.41         | 0.109        | 0.091        |
| <b>mean</b> | <b>24.59</b>  | <b>28.93</b>  | <b>2.73</b>  | <b>2.90</b>  | <b>1.83</b>  | <b>1.88</b>  | <b>1.68</b>  | <b>1.85</b>  | <b>1.52</b>  | <b>1.51</b>  | <b>0.13</b>  | <b>0.16</b>  | <b>0.65</b>  | <b>0.61</b>  | <b>0.12</b>  | <b>0.11</b>  |
| DHA         | 23.56         | 48.74         | 2.88         | 3.2          | 1.68         | 1.79         | 2.226        | 2.121        | 3.198        | 1.578        | 0.12         | 0.094        | 0.635        | 0.79         | 0.138        | 0.123        |
| DHA         | 39.9          | 39            | 3.11         | 2.87         | 1.95         | 1.87         | 1.87         | 1.429        | 1.797        | 1.961        | 0.126        | 0.09         | 0.695        | 0.534        | 0.158        | 0.114        |
| DHA         | 38.35         | 30.79         | 3.66         | 3.81         | 2.28         | 2.81         | 2.262        | 2.171        | 2.531        | 2.654        | 0.133        | 0.143        | 1.2          | 1.251        | 0.131        | 0.13         |
| DHA         | 38.91         | 40.17         | 3.06         | 2.86         | 2.09         | 2.05         | 1.558        | 1.517        | 1.706        | 2.643        | 0.104        | 0.11         | 0.684        | 0.712        | 0.109        | 0.112        |
| DHA         | 18.32         | 27.6          | 2.52         | 2.74         | 1.47         | 1.74         | 1.404        | 1.472        | 0.991        | 1.11         | 0.234        | 0.126        | 0.833        | 0.677        | 0.281        | 0.133        |
| DHA         | 34.49         | 30.37         | 3.05         | 2.84         | 1.61         | 1.76         | 1.654        | 1.42         | 1.045        | 2.064        | 0.103        | 0.112        | 0.492        | 0.477        | 0.157        | 0.121        |
| DHA         | 57.42         | 40.71         | 3.01         | 3.37         | 1.88         | 1.64         | 2.982        | 3.821        | 1.609        | 1.622        | 0.213        | 0.283        | 0.581        | 0.653        | 0.117        | 0.215        |
| DHA         | 30.77         | 52.91         | 2.83         | 3.36         | 1.82         | 2.11         | 1.775        | 2.715        | 2.181        | 2.87         | 0.118        | 0.155        | 0.637        | 0.714        | 0.124        | 0.107        |
| DHA         | 22.49         | 44.24         | 2.25         | 3.36         | 1.74         | 1.89         | 1.13         | 2.02         | 1.141        | 2.218        | n.d          | 0.134        | 0.492        | 0.541        | 0.088        | 0.09         |
| DHA         | 56.26         | 62.3          | 3.14         | 2.68         | 2.26         | 2.26         | 2.044        | 1.432        | 2.347        | 1.6          | 0.139        | 0.134        | 0.535        | 0.638        | 0.114        | 0.115        |
| DHA         | 22.79         | 29.35         | 2.96         | 4.46         | 1.67         | 2.4          | 1.549        | 2.072        | 1.433        | 2.471        | 0.182        | 0.229        | 0.775        | 0.691        | 0.207        | 0.142        |
| DHA         | 35.14         | 42.22         | 2.54         | 2.25         | 1.84         | 1.85         | 1.696        | 1.632        | 1.215        | 1.257        | 0.102        | 0.158        | 0.601        | 0.712        | 0.115        | 0.115        |
| DHA         | 50.22         | 26.25         | 2.92         | 2.32         | 1.84         | 1.83         | 1.542        | 1.336        | 1.888        | 3.742        | 0.117        | 0.152        | 0.532        | 0.525        | 0.105        | 0.112        |
| DHA         | 27.63         | 19.11         | 2.59         | 2.53         | 1.78         | 1.72         | 1.791        | 1.63         | 1.701        | 1.371        | 0.127        | 0.109        | 0.597        | 0.645        | 0.134        | 0.16         |
| <b>mean</b> | <b>35.45</b>  | <b>38.13</b>  | <b>2.89</b>  | <b>3.05</b>  | <b>1.85</b>  | <b>1.98</b>  | <b>1.82</b>  | <b>1.91</b>  | <b>1.77</b>  | <b>2.08</b>  | <b>0.14</b>  | <b>0.14</b>  | <b>0.66</b>  | <b>0.68</b>  | <b>0.14</b>  | <b>0.13</b>  |
| DHA+AC      | 24.79         | 28.61         | 3.22         | 3.29         | 1.59         | 1.56         | 1.821        | 1.712        | 0.763        | 1.197        | 0.152        | 0.161        | 1.042        | 0.604        | 0.176        | 0.113        |
| DHA+AC      | 25.8          | 30.71         | 2.95         | 3.6          | 1.92         | 2.34         | 1.39         | 1.61         | 1.419        | 1.757        | 0.138        | 0.219        | 0.626        | 0.72         | 0.144        | 0.192        |
| DHA+AC      | 21.73         | 39.77         | 3.19         | 3.45         | 2.26         | 1.95         | 1.662        | 2.181        | 2.446        | 2.836        | 0.133        | 0.156        | 0.699        | 0.7          | 0.137        | 0.171        |
| DHA+AC      | 27.95         | 25.29         | 3.33         | 2.61         | 1.9          | 1.89         | 2.773        | 1.83         | 2.672        | 2.441        | 0.143        | 0.143        | 0.686        | 0.626        | 0.118        | 0.107        |
| DHA+AC      | 32.92         | 32.08         | 3.64         | 3.03         | 2.09         | 1.85         | 1.972        | 1.886        | 1.961        | 2.004        | 0.198        | 0.154        | 0.96         | 0.689        | 0.205        | 0.14         |
| DHA+AC      | 30.93         | 30.06         | 2.88         | 2.5          | 1.89         | 1.68         | 2.04         | 1.936        | 1.08         | 1.372        | 0.147        | 0.123        | 0.701        | 0.729        | 0.15         | 0.146        |

|        |              |              |             |             |             |             |             |             |             |             |             |             |             |             |             |             |
|--------|--------------|--------------|-------------|-------------|-------------|-------------|-------------|-------------|-------------|-------------|-------------|-------------|-------------|-------------|-------------|-------------|
| DHA+AC | 29.22        | 54.02        | 3.34        | 6.39        | 2.16        | 2           | 2.212       | 4.325       | 2.838       | 2.298       | 0.259       | 0.262       | 0.824       | 0.704       | 0.189       | 0.12        |
| DHA+AC | 18.84        | 25.03        | 2.55        | 2.42        | 1.97        | 2.14        | 1.263       | 1.716       | 1.078       | 1.139       | 0.078       | 0.107       | 0.723       | 0.67        | 0.102       | 0.126       |
| DHA+AC | 23.25        | 25.98        | 2.93        | 2.38        | 1.67        | 1.42        | 2.377       | 1.669       | 1.954       | 1.293       | 0.61        | 0.404       | 0.64        | 0.581       | 0.151       | 0.111       |
| DHA+AC | 22.69        | 29.28        | 2.84        | 3.34        | 1.77        | 1.89        | 1.739       | 2.038       | 1.894       | 1.838       | 0.088       | 0.162       | 0.698       | 0.632       | 0.099       | 0.115       |
| DHA+AC | 23.88        | 20.37        | 2.52        | 2.34        | 1.79        | 1.8         | 1.291       | 1.338       | 1.455       | 1.121       | 0.105       | 0.127       | 0.682       | 0.558       | 0.098       | 0.088       |
| DHA+AC | 19.81        | 21.65        | 2.31        | 2.39        | 1.53        | 1.64        | 1.622       | 1.48        | 1.017       | 1.101       | 0.079       | 0.087       | 0.704       | 0.551       | 0.088       | 0.097       |
| mean   | <b>25.15</b> | <b>30.24</b> | <b>2.98</b> | <b>3.15</b> | <b>1.88</b> | <b>1.85</b> | <b>1.85</b> | <b>1.98</b> | <b>1.71</b> | <b>1.70</b> | <b>0.18</b> | <b>0.18</b> | <b>0.75</b> | <b>0.65</b> | <b>0.14</b> | <b>0.13</b> |
| DHA+OB | 23.27        | 23.23        | 2.85        | 3.1         | 1.96        | 2.65        | 1.694       | 2.233       | 1.135       | 3.595       | 0.103       | 0.132       | 0.523       | 0.597       | 0.125       | 0.121       |
| DHA+OB | 18.09        | 29.67        | 2.86        | 3.63        | 1.85        | 2.28        | 1.613       | 2.302       | 1.797       | 4.149       | 0.205       | 0.187       | 0.883       | 0.749       | 0.239       | 0.165       |
| DHA+OB | 52.98        | 30.77        | 2.65        | 2.57        | 1.73        | 1.77        | 1.742       | 1.481       | 2.044       | 1.736       | 0.091       | 0.109       | 0.731       | 0.558       | 0.106       | 0.134       |
| DHA+OB | 21.22        | 31.78        | 4.05        | 4.4         | 1.8         | 1.98        | 2.121       | 2.339       | 1.341       | 1.686       | 0.239       | 0.277       | 0.56        | 0.522       | 0.143       | 0.12        |
| DHA+OB | 194.62       | 162.79       | 3           | 2.71        | 2.39        | 1.94        | 1.501       | 1.546       | 0.834       | 1.88        | 0.161       | 0.119       | 0.774       | 0.668       | 0.183       | 0.166       |
| DHA+OB | 22.21        | 31.26        | 2.17        | 2.45        | 1.46        | 1.59        | 1.169       | 1.391       | 1.271       | 1.77        | 0.14        | 0.097       | 1.101       | 0.862       | 0.149       | 0.1         |
| DHA+OB | 21.93        | 23.4         | 3.14        | 3.81        | 2.28        | 2           | 2.064       | 2.632       | 1.885       | 1.996       | 0.136       | 0.315       | 0.772       | 0.511       | 0.106       | 0.087       |
| DHA+OB | 23.73        | 30.12        | 3.05        | 3.11        | 2.08        | 2.09        | 1.818       | 2.226       | 1.584       | 1.676       | 0.112       | 0.098       | 0.639       | 0.597       | 0.094       | 0.102       |
| DHA+OB | 14.75        | 17.67        | 2.36        | 2.46        | 1.88        | 1.64        | 1.153       | 1.636       | 1.321       | 1.813       | 0.122       | 0.401       | 0.59        | 0.916       | 0.102       | 0.452       |
| DHA+OB | 26.29        | 39.6         | 2.39        | 2.28        | 1.62        | 1.83        | 1.33        | 1.359       | 1.289       | 2.332       | 0.137       | 0.104       | 0.904       | 0.77        | 0.193       | 0.117       |
| DHA+OB | 17.81        | 22.48        | 2.93        | 2.53        | 1.97        | 1.78        | 2.101       | 1.557       | 1.523       | 1.715       | 0.307       | 0.145       | 0.979       | 0.529       | 0.202       | 0.117       |
| DHA+OB | 17.33        | 28.26        | 2.37        | 2.43        | 1.67        | 1.95        | 1.37        | 1.82        | 1.167       | 1.753       | 0.108       | 0.173       | 0.565       | 0.538       | 0.124       | 0.109       |
| DHA+OB | 14.07        | 15.73        | 1.91        | 1.99        | 1.53        | 1.7         | 1.05        | 1.232       | 1.162       | 0.775       | n.d         | 0.095       | 0.483       | 0.494       | 0.1         | 0.092       |
| mean   | <b>36.02</b> | <b>37.44</b> | <b>2.75</b> | <b>2.88</b> | <b>1.86</b> | <b>1.94</b> | <b>1.59</b> | <b>1.83</b> | <b>1.41</b> | <b>2.07</b> | <b>0.16</b> | <b>0.17</b> | <b>0.73</b> | <b>0.64</b> | <b>0.14</b> | <b>0.14</b> |

\* Value was removed as an outlier. Concentrations are given in  $\mu\text{M}$ . n.d – not detected.

Table S2. Quantification of main polyphenol metabolites in fasting serum at T0 and T28 of the dairy intervention.

|    | Concentration in fasting serum ( $\mu\text{M}$ ) |      |                                   |      |               |      |                   |      |               |       |                |      |               |       |
|----|--------------------------------------------------|------|-----------------------------------|------|---------------|------|-------------------|------|---------------|-------|----------------|------|---------------|-------|
|    | 4-hydroxybenzoic acid                            |      | 3-(3-hydroxyphenyl)propanoic acid |      | vanillic acid |      | homovanillic acid |      | hippuric acid |       | t-ferulic acid |      | Cinnamic acid |       |
|    | T0                                               | T28  | T0                                | T28  | T0            | T28  | T0                | T28  | T0            | T28   | T0             | T28  | T0            | T28   |
| AC | n.d.                                             | n.d. | 0.44                              | 0.74 | 0.02          | 0.81 | 0.13              | 0.13 | 1.97          | 6.04  | n.d.           | n.d. | 9.74          | 9.36  |
| AC | n.d.                                             | n.d. | 1.06                              | 2.10 | 0.03          | 0.07 | 0.12              | 0.49 | 7.89          | 12.38 | n.d.           | n.d. | 9.75          | 10.15 |
| AC | n.d.                                             | n.d. | 0.90                              | 1.09 | 0.01          | 0.01 | 0.09              | 0.14 | 24.15         | 15.81 | n.d.           | n.d. | 9.44          | 9.15  |
| AC | n.d.                                             | n.d. | 0.35                              | 0.34 | 0.02          | 0.01 | 0.16              | n.d. | 3.20          | 1.46  | n.d.           | n.d. | 9.30          | 6.98  |
| AC | n.d.                                             | n.d. | 1.66                              | 1.84 | n.d.          | 0.03 | 0.29              | 0.14 | 7.61          | 12.57 | n.d.           | n.d. | 8.69          | 8.52  |
| AC | n.d.                                             | n.d. | 1.42                              | 0.73 | 0.02          | 0.01 | 0.09              | 0.12 | 9.91          | 3.68  | n.d.           | 0.00 | 8.94          | 9.62  |
| AC | 1.27                                             | 1.84 | 0.12                              | 0.38 | 0.01          | 0.01 | 0.08              | 0.07 | 1.22          | 0.83  | n.d.           | n.d. | 8.96          | 9.10  |
| AC | n.d.                                             | n.d. | 0.43                              | 0.57 | 0.01          | 0.00 | 0.15              | 0.17 | 5.14          | 11.28 | n.d.           | 0.01 | 9.23          | 9.09  |

|             |             |             |             |             |             |             |             |             |             |             |             |             |             |             |
|-------------|-------------|-------------|-------------|-------------|-------------|-------------|-------------|-------------|-------------|-------------|-------------|-------------|-------------|-------------|
| AC          | n.d.        | n.d.        | 0.44        | 0.96        | n.d.        | 0.01        | 0.09        | 0.16        | 6.60        | 11.48       | n.d.        | n.d.        | 9.02        | 8.73        |
| AC          | n.d.        | n.d.        | 0.69        | 1.04        | 0.00        | 0.01        | 0.09        | 0.12        | 7.66        | 5.03        | n.d.        | n.d.        | 9.07        | 8.52        |
| AC          | n.d.        | n.d.        | 1.11        | 1.71        | 0.01        | 0.03        | 0.18        | 0.20        | 22.37       | 11.54       | n.d.        | n.d.        | 10.64       | 8.61        |
| AC          | n.d.        | n.d.        | 2.65        | 0.80        | 0.01        | 0.02        | 0.12        | 0.27        | 11.43       | 6.80        | n.d.        | n.d.        | 8.15        | 8.91        |
| AC          | n.d.        | n.d.        | 0.52        | 1.84        | n.d.        | 0.01        | 0.10        | 0.13        | 18.63       | 16.18       | n.d.        | n.d.        | 9.37        | 9.16        |
| AC          | n.d.        | n.d.        | 2.40        | 3.76        | 0.02        | 0.01        | 0.17        | 0.20        | 7.83        | 4.33        | 0.01        | n.d.        | 8.62        | 9.08        |
| AC          | n.d.        | n.d.        | 0.47        | 0.51        | n.d.        | 0.01        | 0.05        | n.d.        | 3.65        | 4.23        | n.d.        | n.d.        | 8.48        | 9.51        |
| <b>mean</b> | <b>1.27</b> | <b>1.84</b> | <b>0.98</b> | <b>1.23</b> | <b>0.02</b> | <b>0.07</b> | <b>0.13</b> | <b>0.18</b> | <b>9.28</b> | <b>8.24</b> | <b>0.01</b> | <b>0.00</b> | <b>9.16</b> | <b>8.96</b> |
| OBG         | n.d.        | n.d.        | 1.02        | 1.08        | 0.00        | 0.01        | 0.04        | 0.09        | 21.12       | 8.55        | n.d.        | n.d.        | 7.46        | 8.58        |
| OBG         | n.d.        | n.d.        | 1.11        | 0.82        | 0.01        | 0.02        | 0.04        | 0.18        | 4.23        | 5.50        | n.d.        | n.d.        | 8.52        | 9.88        |
| OBG         | n.d.        | 0.12        | 1.28        | 2.09        | 0.01        | 0.04        | 0.13        | 0.20        | 6.96        | 4.33        | n.d.        | n.d.        | 8.92        | 11.14       |
| OBG         | n.d.        | n.d.        | 0.19        | 0.65        | 0.39        | 0.50        | 0.13        | 0.06        | 4.27        | 4.39        | n.d.        | n.d.        | 9.07        | 9.58        |
| OBG         | n.d.        | n.d.        | 0.55        | 0.69        | 0.02        | 0.01        | 0.14        | 0.17        | 5.88        | 2.89        | n.d.        | n.d.        | 9.84        | 9.97        |
| OBG         | n.d.        | n.d.        | 0.59        | 1.06        | 0.01        | 0.01        | 0.09        | 0.06        | 2.72        | 6.19        | n.d.        | n.d.        | 9.11        | 8.80        |
| OBG         | n.d.        | n.d.        | 0.74        | 0.72        | n.d.        | 0.06        | 0.10        | 0.18        | 15.84       | 7.22        | n.d.        | n.d.        | 9.48        | 9.78        |
| OBG         | n.d.        | n.d.        | 0.66        | 1.26        | n.d.        | 0.02        | 0.05        | 0.10        | 4.14        | 7.98        | 0.01        | n.d.        | 8.42        | 8.52        |
| OBG         | n.d.        | n.d.        | 1.27        | 1.20        | 0.01        | 0.01        | 0.10        | 0.16        | 2.92        | 2.33        | n.d.        | n.d.        | 9.97        | 8.67        |
| OBG         | n.d.        | n.d.        | 1.07        | 1.02        | 0.03        | 0.01        | 0.18        | 0.07        | 13.54       | 8.35        | 0.01        | n.d.        | 10.06       | 8.17        |
| OBG         | n.d.        | n.d.        | 1.10        | 0.47        | 0.02        | 0.36        | 0.14        | 0.06        | 2.10        | 3.56        | n.d.        | n.d.        | 10.18       | 8.82        |
| OBG         | n.d.        | n.d.        | 0.89        | 0.94        | 0.01        | n.d.        | 0.06        | 0.24        | 11.89       | 5.87        | n.d.        | n.d.        | 9.65        | 9.69        |
| <b>mean</b> | <b>n/a</b>  | <b>0.12</b> | <b>0.87</b> | <b>1.00</b> | <b>0.05</b> | <b>0.09</b> | <b>0.10</b> | <b>0.13</b> | <b>7.97</b> | <b>5.60</b> | <b>0.01</b> | <b>n/a</b>  | <b>9.22</b> | <b>9.30</b> |
| DHA         | n.d.        | n.d.        | 0.87        | 2.10        | 0.02        | 0.02        | 0.10        | 0.30        | 6.60        | 8.52        | n.d.        | n.d.        | 8.81        | 9.23        |
| DHA         | n.d.        | n.d.        | 5.28        | 1.01        | 0.02        | 0.01        | 0.30        | 0.21        | 11.47       | 1.80        | n.d.        | n.d.        | 9.35        | 10.10       |
| DHA         | n.d.        | n.d.        | 0.45        | 0.69        | 0.03        | 0.02        | 0.14        | 0.09        | 7.64        | 6.47        | n.d.        | n.d.        | 7.04        | 9.61        |
| DHA         | n.d.        | 0.65        | 0.71        | 0.52        | n.d.        | 0.02        | 0.09        | 0.10        | 7.34        | 3.79        | n.d.        | n.d.        | 9.89        | 10.12       |
| DHA         | n.d.        | n.d.        | 0.78        | 0.78        | 0.01        | 0.01        | 0.07        | 0.13        | 4.18        | 6.30        | n.d.        | n.d.        | 9.53        | 9.23        |
| DHA         | n.d.        | n.d.        | 1.42        | 2.59        | 0.02        | 0.02        | 0.09        | 0.11        | 4.17        | 3.93        | n.d.        | n.d.        | 8.83        | 9.71        |
| DHA         | n.d.        | n.d.        | 2.71        | 1.39        | 0.02        | 0.01        | 0.30        | 0.12        | 37.25       | 30.29       | 0.01        | 0.00        | 11.44       | 9.30        |
| DHA         | n.d.        | n.d.        | 3.73        | 3.94        | 0.01        | 0.00        | 0.05        | 0.12        | 2.88        | 10.03       | n.d.        | n.d.        | 8.89        | 9.42        |
| DHA         | n.d.        | n.d.        | 0.97        | 1.24        | n.d.        | 0.01        | 0.07        | 0.24        | 6.16        | 9.93        | n.d.        | n.d.        | 7.95        | 9.71        |
| DHA         | n.d.        | n.d.        | 2.15        | 1.13        | 0.02        | 0.03        | 0.42        | 0.12        | 8.57        | 5.30        | n.d.        | n.d.        | 9.24        | 7.96        |
| DHA         | n.d.        | n.d.        | 1.10        | 1.73        | 0.01        | 0.01        | 0.05        | 0.21        | 10.89       | 10.27       | n.d.        | n.d.        | 8.98        | 9.98        |
| DHA         | n.d.        | n.d.        | 0.50        | 0.35        | 0.01        | 0.01        | 0.11        | 0.17        | 9.08        | 5.36        | n.d.        | n.d.        | 9.03        | 9.25        |
| DHA         | n.d.        | 0.46        | 1.15        | 1.22        | 0.00        | 0.04        | n.d.        | 0.10        | 6.77        | 13.97       | n.d.        | 0.00        | 9.71        | 9.87        |
| DHA         | n.d.        | n.d.        | 1.05        | 1.60        | 0.00        | 0.01        | 0.11        | 0.23        | 1.11        | 0.91        | n.d.        | n.d.        | 7.86        | 9.63        |
| <b>mean</b> | <b>n/a</b>  | <b>0.56</b> | <b>1.63</b> | <b>1.45</b> | <b>0.01</b> | <b>0.02</b> | <b>0.14</b> | <b>0.16</b> | <b>8.86</b> | <b>8.35</b> | <b>0.01</b> | <b>0.00</b> | <b>9.04</b> | <b>9.51</b> |
| DHA+AC      | 0.12        | n.d.        | 0.71        | 0.70        | 0.01        | 0.01        | 0.06        | 0.08        | 9.89        | 9.11        | n.d.        | 0.00        | 9.04        | 8.51        |
| DHA+AC      | n.d.        | n.d.        | 0.24        | 0.52        | 0.02        | 0.01        | 0.17        | 0.15        | 5.00        | 2.34        | n.d.        | n.d.        | 10.13       | 8.92        |

|        |             |            |             |             |             |             |             |             |             |             |             |             |             |             |
|--------|-------------|------------|-------------|-------------|-------------|-------------|-------------|-------------|-------------|-------------|-------------|-------------|-------------|-------------|
| DHA+AC | n.d.        | n.d.       | 0.65        | 0.89        | 0.02        | 0.02        | 0.09        | 0.04        | 5.30        | 19.16       | 0.01        | n.d.        | 9.67        | 10.01       |
| DHA+AC | n.d.        | n.d.       | 1.06        | 0.45        | 0.02        | n.d.        | 0.09        | 0.09        | 3.17        | 3.00        | n.d.        | n.d.        | 8.59        | 8.86        |
| DHA+AC | n.d.        | n.d.       | 0.88        | 1.45        | 0.01        | 0.04        | 0.08        | 0.07        | 5.23        | 6.58        | n.d.        | n.d.        | 10.08       | 10.19       |
| DHA+AC | n.d.        | n.d.       | 1.37        | 0.97        | 0.05        | 0.02        | 0.17        | 0.14        | 2.16        | 4.69        | n.d.        | 0.01        | 9.81        | 8.35        |
| DHA+AC | n.d.        | n.d.       | 0.96        | 1.06        | 0.01        | 0.01        | 0.15        | 0.08        | 4.76        | 5.62        | n.d.        | n.d.        | 8.40        | 8.56        |
| DHA+AC | n.d.        | n.d.       | 0.66        | 0.73        | 0.02        | 0.01        | 0.21        | 0.13        | 3.48        | 3.20        | n.d.        | n.d.        | 9.36        | 9.83        |
| DHA+AC | n.d.        | n.d.       | 2.26        | 1.60        | 0.01        | 0.02        | 0.16        | 0.08        | 6.66        | 8.81        | 0.01        | n.d.        | 9.47        | 9.51        |
| DHA+AC | n.d.        | n.d.       | 0.44        | 1.30        | n.d.        | 0.03        | 0.10        | 0.20        | 11.44       | 12.90       | n.d.        | n.d.        | 9.25        | 8.91        |
| DHA+AC | n.d.        | n.d.       | 0.41        | 0.75        | 0.01        | 0.01        | 0.09        | n.d.        | 2.87        | 12.66       | n.d.        | n.d.        | 7.22        | 10.46       |
| DHA+AC | n.d.        | n.d.       | 0.51        | 0.25        | 0.01        | 0.01        | 0.16        | 0.08        | 8.64        | 4.01        | n.d.        | n.d.        | 9.94        | 8.29        |
| mean   | <b>0.12</b> | <b>n/a</b> | <b>0.85</b> | <b>0.89</b> | <b>0.02</b> | <b>0.02</b> | <b>0.12</b> | <b>0.10</b> | <b>5.72</b> | <b>7.67</b> | <b>0.01</b> | <b>0.00</b> | <b>9.25</b> | <b>9.20</b> |
| DHA+OB | n.d.        | n.d.       | 0.66        | 1.06        | n.d.        | 0.01        | 0.10        | 0.17        | 5.80        | 2.80        | n.d.        | n.d.        | 10.12       | 9.97        |
| DHA+OB | n.d.        | n.d.       | 0.33        | 0.34        | 0.02        | 0.03        | 0.09        | 0.06        | 3.56        | 1.57        | n.d.        | n.d.        | 10.04       | 10.02       |
| DHA+OB | n.d.        | n.d.       | 3.75        | 1.00        | 0.01        | 0.01        | 0.29        | 0.16        | 32.30       | 8.33        | 0.00        | n.d.        | 11.09       | 7.94        |
| DHA+OB | n.d.        | n.d.       | 2.74        | 0.78        | 0.01        | 0.03        | 0.16        | 0.08        | 6.00        | 4.97        | n.d.        | n.d.        | 9.87        | 9.15        |
| DHA+OB | n.d.        | n.d.       | 0.71        | 1.03        | 0.02        | 0.02        | 0.16        | 0.19        | 3.51        | 6.70        | n.d.        | 0.00        | 10.23       | 9.78        |
| DHA+OB | n.d.        | n.d.       | 1.15        | 1.17        | 0.01        | 0.01        | 0.13        | 0.08        | 7.99        | 10.48       | n.d.        | n.d.        | 10.19       | 10.43       |
| DHA+OB | n.d.        | n.d.       | 1.54        | 1.54        | 0.01        | 0.01        | 0.11        | 0.12        | 6.29        | 5.81        | n.d.        | n.d.        | 9.78        | 8.17        |
| DHA+OB | n.d.        | n.d.       | 1.72        | 1.54        | 0.01        | 0.02        | 0.31        | 0.18        | 14.88       | 10.78       | n.d.        | n.d.        | 8.59        | 9.58        |
| DHA+OB | n.d.        | n.d.       | 1.68        | 1.18        | 0.01        | 0.03        | 0.07        | 0.07        | 3.45        | 6.27        | n.d.        | n.d.        | 9.71        | 9.83        |
| DHA+OB | n.d.        | n.d.       | 1.44        | 0.85        | n.d.        | 0.01        | 0.19        | 0.19        | 6.56        | 1.88        | n.d.        | n.d.        | 8.72        | 8.94        |
| DHA+OB | n.d.        | n.d.       | 0.26        | 0.53        | 0.00        | 0.01        | 0.19        | 0.14        | 9.90        | 8.26        | n.d.        | n.d.        | 9.11        | 8.80        |
| DHA+OB | n.d.        | n.d.       | 0.53        | 3.22        | 0.01        | 0.02        | 0.12        | 0.10        | 3.57        | 4.21        | n.d.        | n.d.        | 7.85        | 9.64        |
| DHA+OB | n.d.        | n.d.       | 1.77        | 3.31        | n.d.        | 0.01        | 0.13        | 0.15        | 1.42        | 8.64        | 0.01        | 0.00        | 8.82        | 9.34        |
| mean   | <b>n/a</b>  | <b>n/a</b> | <b>1.40</b> | <b>1.35</b> | <b>0.01</b> | <b>0.02</b> | <b>0.16</b> | <b>0.13</b> | <b>8.09</b> | <b>6.21</b> | <b>0.01</b> | <b>0.00</b> | <b>9.55</b> | <b>9.35</b> |

Concentration is given in  $\mu\text{M}$ . Following compounds were found <LOD: 2,6-diOH-benzoic acid, 3,5-diOH-benzoic acid, 2,5-diOH-benzoic acid, protocatechuic acid, gallic acid, p-coumaric acid, m-coumaric acid, o-coumaric acid, 3,4-hydroxyphenyl propionic acid, 3-hydroxyphenyl acetic acid, 3,4-dihydroxyphenyl acetic acid, alpha-hydroxyhippuric acid, caffeic acid, ellagic acid, sinapic acid, syringic acid, urolithin A, urolithin B, pyrocatechol, pyrogallol, Catechin, 3-O-methylgallic acid, phloroglucinol, delphinidin-3-glucoside, delphinidin-3-galactoside (as dp-3-glc), cyanidin-3-glucoside, cyanidin-3-galactoside, petunidin-3-glucoside, petunidin-3-galactoside (as pt-3-glc), peonidin-3-glucoside, peonidin-3-galactoside, malvidin-3-glucoside, malvidin-3-galactoside, pelargonidin-3-glucoside, pelargonidin-3-galactoside (as Pg-3-glc); n.d = not detected. n/a = not applicable.
